# Supplementary material
Source: PubMed Central journal article supplement (PMC3014449)
Supplement: NIHMS252483-supplement-01.pdf [file NIHMS252483-supplement-01.pdf]

# **Novel analogues of the therapeutic complement inhibitor compstatin with significantly improved affinity and potency<sup>1</sup>**

*Hongchang Qu,<sup>†,#</sup> Paola Magotti,<sup>†,#</sup> Daniel Ricklin,<sup>†</sup> Emilia L. Wu,<sup>‡</sup> Ioannis Kourtzelis,<sup>†</sup>*

*You-Qiang Wu,<sup>†</sup> Yiannis N Kaznessis,<sup>‡</sup> and John D. Lambris<sup>\*†</sup>*

<sup>†</sup>Department of Pathology and Laboratory Medicine, University of Pennsylvania, Philadelphia, PA 19104, and

<sup>‡</sup>Department of Chemical Engineering and Materials Science, University of Minnesota, Minneapolis, MN 55455. <sup>#</sup> These authors contributed equally.

## **Supplementary Material**

### **Table of Content**

Representative ELISA curves-----S2

Representative ITC curves-----S3

Assay method correlation plots-----S4

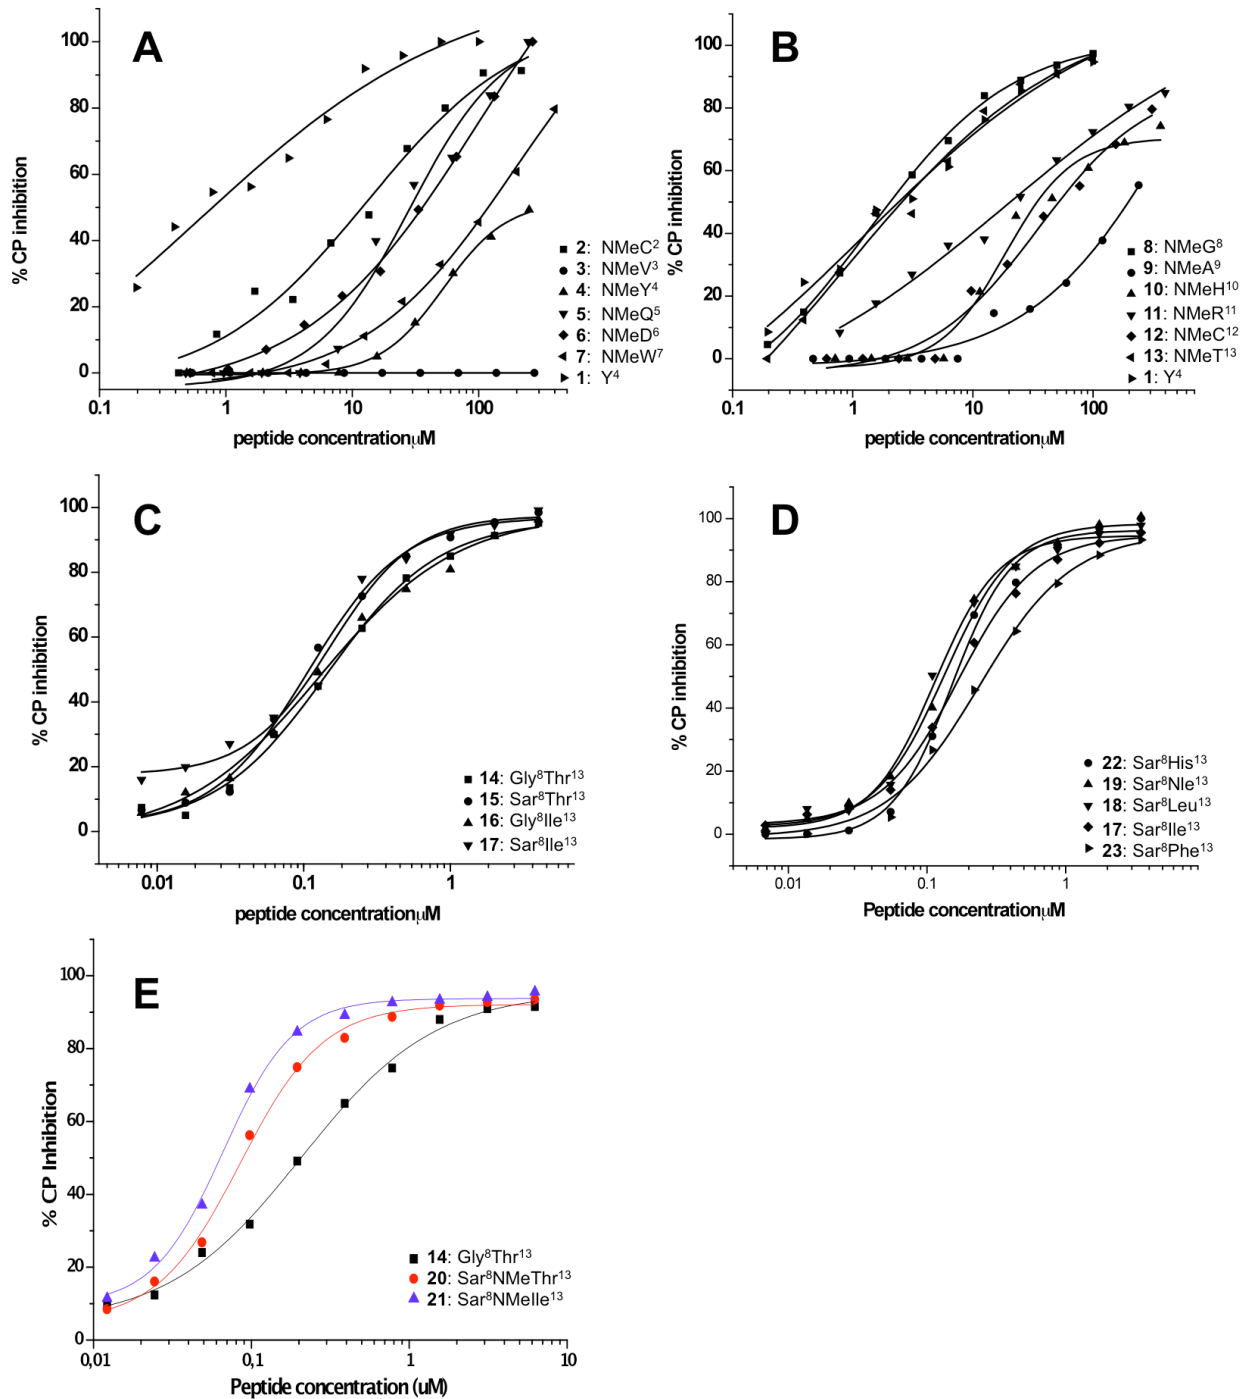

**Suppl. Figure 1.** Inhibition of the classical pathway (CP) of complement activation as tested by ELISA. **A+B:** Compstatin analogs with various positions of backbone N-methylation on a [Tyr<sup>4</sup>]-Ac-compstatin template (peptides **1-13**). **C-E:** Specific peptide modification of [Trp(Me)<sup>4</sup>]-Ac-compstatin at position 8 and 13 (peptides **14-23**). IC<sub>50</sub> values are not normalized.

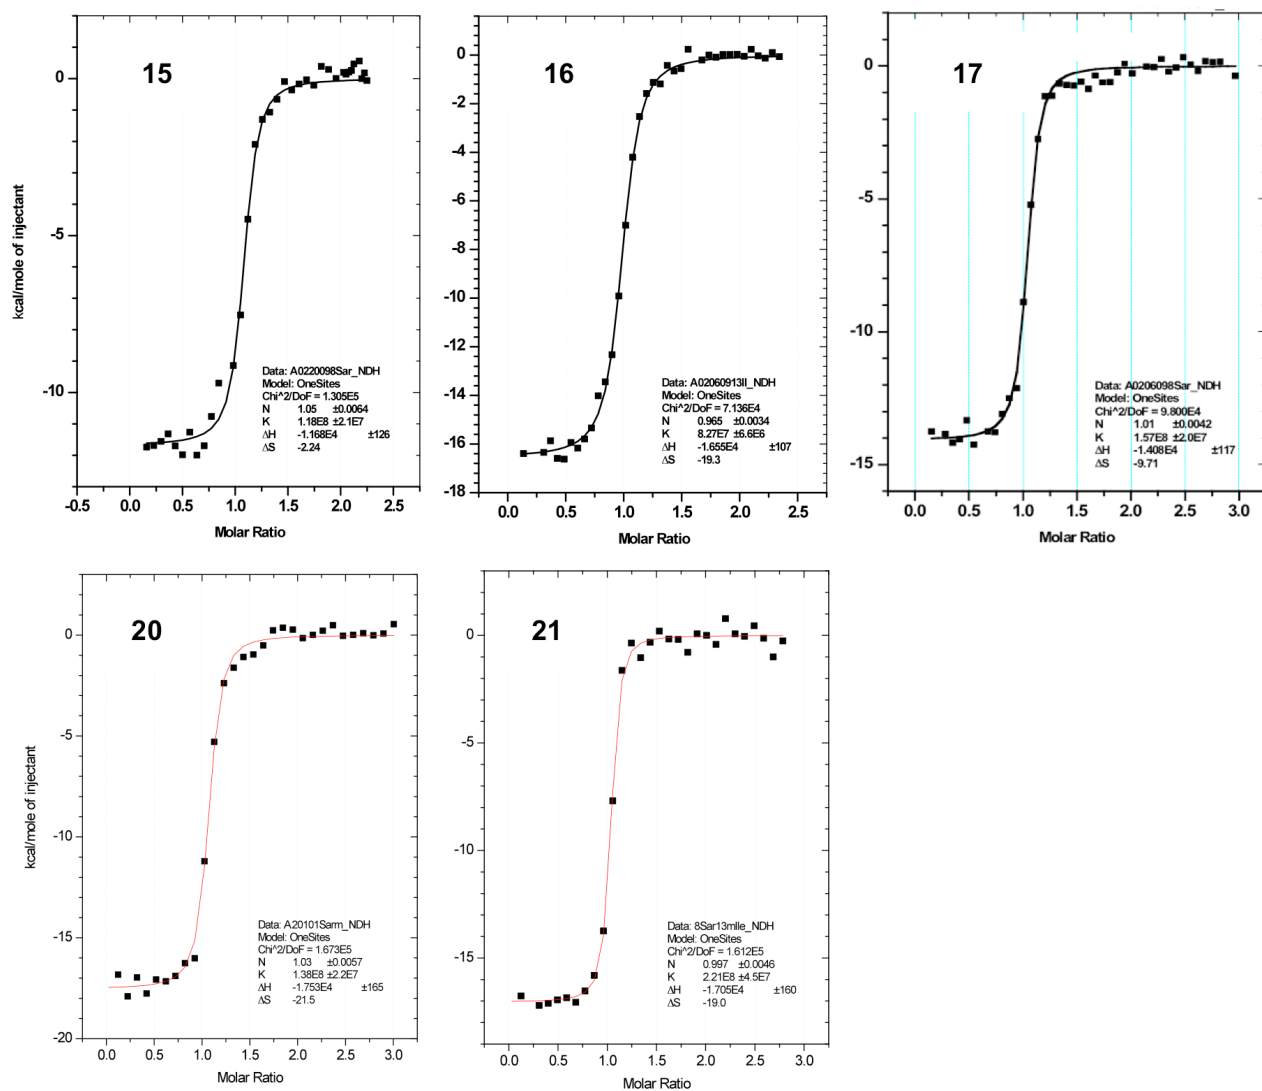

**Suppl. Figure 2.** ITC data for the binding of panel of tested analogs (peptides **15-17, 20-21**) to C3 with fit to a “single set of sites’ model.

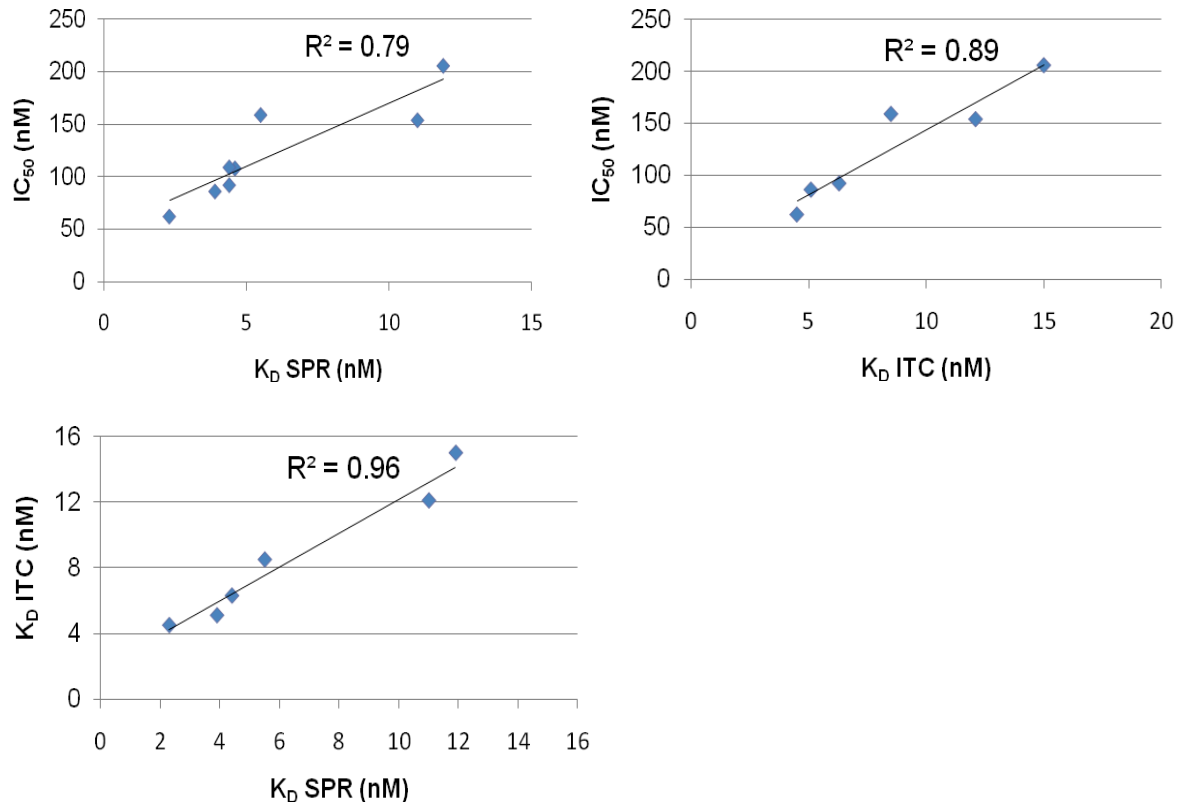

**Suppl. Figure 3.** Correlation between complement inhibitory potency ( $IC_{50}$ ) from ELISA and binding affinities ( $K_D$ ) derived from SPR and ITC.
